# Supplementary material for: Dehydroepiandrosterone Sulfate, an Adrenal Androgen, Is Inversely Associated with Prevalence of Dynapenia in Male Individuals with Type 2 Diabetes
Source: MDPI journal article supplement (doi:10.3390/metabo13111129), 2023-11-03
Supplement: s1 [file s1]

**Table S1.**

Multiple linear regression analysis with identified variables and medications used for determinants of SMI, HS and GS in individuals with T2D

| Variables                 | SMI     |       |         | HS      |       |         | GS      |        |         |
|---------------------------|---------|-------|---------|---------|-------|---------|---------|--------|---------|
|                           | t value | VIF   | p value | t value | VIF   | p value | t value | VIF    | p value |
| Age                       | 9.127   | 1.554 | <0.001  | -6.768  | 1.782 | <0.001  | -5.200  | 1.563  | <0.001  |
| Male                      | 15.970  | 1.334 | <0.001  | 13.310  | 1.562 | <0.001  | -1.088  | 1.117  | 0.277   |
| BMI                       | 20.900  | 1.500 | <0.001  | 2.487   | 1.671 | 0.013   | -1.632  | 1.482  | 0.104   |
| Exercise ( $\geq 3$ Mets) | 2.704   | 1.138 | 0.004   | 2.032   | 1.114 | 0.043   | 2.747   | 1.140  | 0.006   |
| Duration of T2D           | -       | -     | -       | 1.478   | 1.733 | 0.141   | -0.484  | 1.238  | 0.628   |
| LDL-C                     | -4.000  | 1.320 | 0.007   | -       | -     | -       | -       | -      | -       |
| UA                        | -       | -     | -       | -2.695  | 1.551 | 0.007   | -       | -      | -       |
| Cr                        | 3.466   | 1.301 | <0.001  | 2.786   | 1.440 | 0.006   | -       | -      | -       |
| ALB                       | -       | -     | -       | 3.661   | 1.246 | <0.001  | 2.276   | 1.154  | 0.024   |
| DHEAS                     | -       | -     | -       | 2.495   | 1.435 | 0.013   | -       | -      | -       |
| ARB or ACEi               | 0.799   | 1.355 | 0.425   | -0.390  | 1.409 | 0.697   | -0.587  | 1.371  | 0.588   |
| CCB                       | 0.723   | 1.444 | 0.470   | 0.487   | 1.402 | 0.627   | -0.476  | 1.090  | 0.635   |
| Statin                    | -3.841  | 1.274 | <0.001  | -0.044  | 1.197 | 0.965   | -0.208  | 1.140  | 0.835   |
| Antiplatelets             | -1.467  | 1.435 | 0.143   | -2.051  | 1.266 | 0.041   | -4.002  | 1.208  | <0.001  |
| Su or Glinide             | -1.218  | 1.263 | 0.224   | -1.832  | 1.326 | 0.178   | 0.251   | -1.266 | 0.802   |
| DPP4i                     | -0.080  | 1.548 | 0.936   | -0.850  | 1.578 | 0.396   | 1.479   | -1.540 | 0.140   |
| Metformin                 | 0.543   | 1.326 | 0.587   | 0.637   | 1.346 | 0.524   | 0.255   | 1.316  | 0.799   |
| $\alpha$ GI               | 0.362   | 1.221 | 0.718   | -0.051  | 1.251 | 0.960   | 2.727   | -1.205 | <0.007  |
| Pioglitazone              | 0.733   | 1.092 | 0.464   | -0.036  | 1.103 | 0.972   | 1.102   | 1.096  | 0.271   |
| SGLT2i                    | 0.317   | 1.191 | 0.751   | 0.847   | 1.327 | 0.397   | 0.641   | 1.185  | 0.522   |
| Insulin                   | -0.843  | 1.184 | 0.400   | -0.495  | 1.330 | 0.621   | 0.873   | -1.195 | 0.383   |
| GLP-1RA                   | 1.446   | 1.474 | 0.149   | 1.350   | 1.506 | 0.178   | 1.598   | -1.473 | 0.111   |

**Table S2.**

Multiple logistic regression analysis including GNRI for determinants of dynapenia in male and female individuals with T2D

| Variables                 | Dynapenia |                |       |         |         |                |       |         |
|---------------------------|-----------|----------------|-------|---------|---------|----------------|-------|---------|
|                           | Males     |                |       |         | Females |                |       |         |
|                           | OR        | 95% CI         | VIF   | p value | OR      | 95% CI         | VIF   | p value |
| Age (1year)               | 1.136     | 1.057 to 1.236 | 2.121 | 0.001   | 1.265   | 1.150 to 1.424 | 1.549 | <0.001  |
| BMI (1kg/m <sup>2</sup> ) | 1.144     | 0.947 to 1.398 | 3.776 | 0.169   | 0.928   | 0.730 to 1.130 | 3.076 | 0.481   |
| Exercise (≥3Mets)         | 0.294     | 0.100 to 0.793 | 1.105 | 0.020   | 0.943   | 0.247 to 3.364 | 1.190 | 0.929   |
| Current Smoking           | 1.306     | 0.318 to 5.230 | 1.296 | 0.705   | 4.362   | 0.152 to 57.30 | 1.096 | 0.296   |
| Hypertension              | 1.421     | 0.464 to 4.399 | 1.560 | 0.537   | 0.987   | 0.251 to 3.886 | 1.480 | 0.985   |
| Dyslipidemia              | 0.305     | 0.078 to 1.116 | 1.271 | 0.078   | 1.998   | 0.459 to 10.43 | 1.199 | 0.379   |
| Duration of T2D (1year)   | 1.061     | 1.003 to 1.126 | 1.276 | 0.045   | 0.984   | 0.929 to 1.037 | 1.316 | 0.556   |
| SBP (1mmHg)               | 0.975     | 0.940 to 1.008 | 1.469 | 0.141   | 1.015   | 0.983 to 1.040 | 1.337 | 0.275   |
| LDL-C (1mg/dL)            | 0.997     | 0.979 to 1.016 | 1.348 | 0.763   | 0.992   | 0.970 to 1.013 | 1.272 | 0.441   |
| HDL-C (1mg/dL)            | 1.007     | 0.962 to 1.051 | 1.380 | 0.807   | 0.994   | 0.948 to 1.041 | 1.545 | 0.810   |
| TG (1mg/dL)               | 1.005     | 0.998 to 1.014 | 1.464 | 0.192   | 0.995   | 0.984 to 1.006 | 1.548 | 0.384   |
| HbA1c (1%)                | 0.845     | 0.547 to 1.176 | 1.351 | 0.358   | 1.070   | 0.701 to 1.517 | 1.238 | 0.727   |
| UA (1mg/dL)               | 1.505     | 0.939 to 2.522 | 1.319 | 0.102   | 0.789   | 0.439 to 1.373 | 1.690 | 0.410   |
| Cr (1mg/dL)               | 0.727     | 0.078 to 2.431 | 1.228 | 0.715   | 0.078   | 0.002 to 1.968 | 1.543 | 0.138   |
| GNRI (1 index)            | 0.936     | 0.852 to 1.116 | 3.985 | 0.133   | 1.035   | 0.967 to 1.144 | 3.122 | 0.379   |
| DHEAS (1μg/dL)            | 0.985     | 0.975 to 0.993 | 1.372 | 0.001   | 1.007   | 0.999 to 1.015 | 1.293 | 0.076   |
